# Supplementary material for: Fabrication of manganese dioxide/carbon/attapulgite composites derived from spent bleaching earth for adsorption of Pb(ii) and Brilliant green
Source: Royal Society of Chemistry journal article supplement (doi:10.1039/c5ra26362j), 2016-01-01
Supplement: c5ra26362j1.pdf [file c5ra26362j1.pdf]

**Fabrication of manganese dioxide/carbon/attapulgitite composites  
derived from spent bleaching earth for adsorption of Pb(II) and  
Brilliant green**

Jie Tang,<sup>a,b</sup> Bin Mu,<sup>a,c</sup> Wenbo Wang,<sup>a,c</sup> Maosong Zheng<sup>a,c</sup> and Aiqin Wang<sup>\*a,c</sup>

<sup>a</sup> *Center of Eco-materials and Green Chemistry, Lanzhou Institute of Chemical Physics,  
Chinese Academy of Sciences, Lanzhou 730000, P. R. China*

<sup>b</sup> *University of Chinese Academy of Sciences, Beijing 100049, P. R. China*

<sup>c</sup> *R&D Center of Xuyi Palygorskite Applied Technology, Lanzhou Institute of Chemical  
Physics, Chinese Academy of Sciences, Xuyi 211700, P.R. China*

---

\* Corresponding author. Tel.: +86 931 4968118; Fax: +86 931 8277088; E-mail address:  
aqwang@licp.cas.cn (A.Q. Wang).

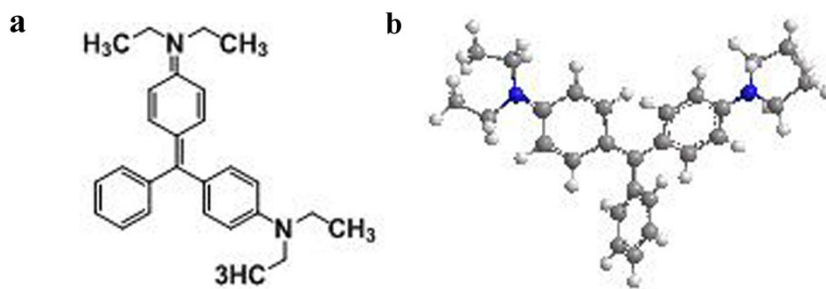

**Fig. S1.** (a) Molecular structure and (b) ball-stick model of BG.

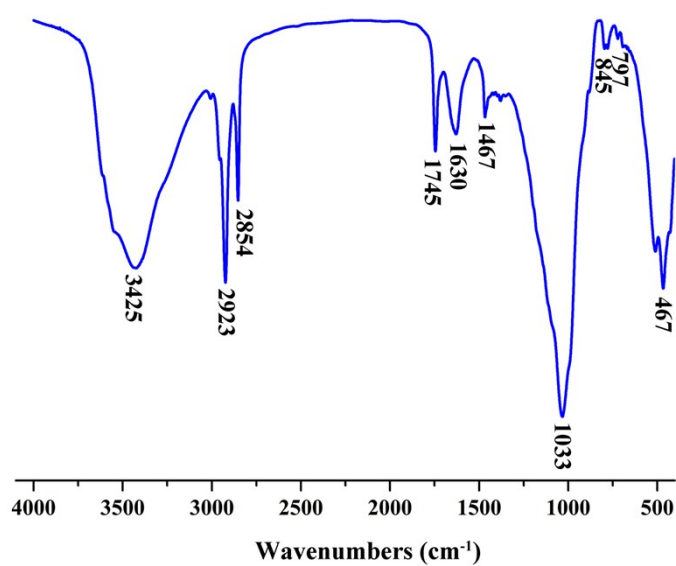

**Fig. S2.** FTIR spectrum of SBE.

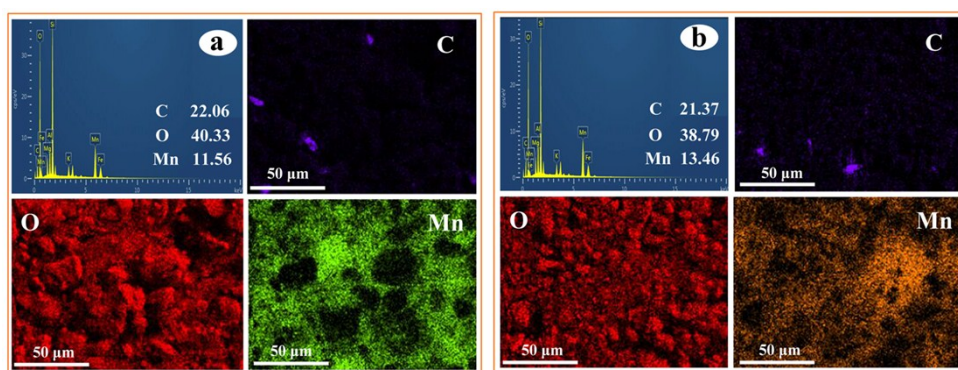

**Fig. S3.** EDS curves and element mapping images of (a) MCA<sub>8</sub> and (b) MCA<sub>9</sub>, the inset show the atomic ratio of C, O and Mn.

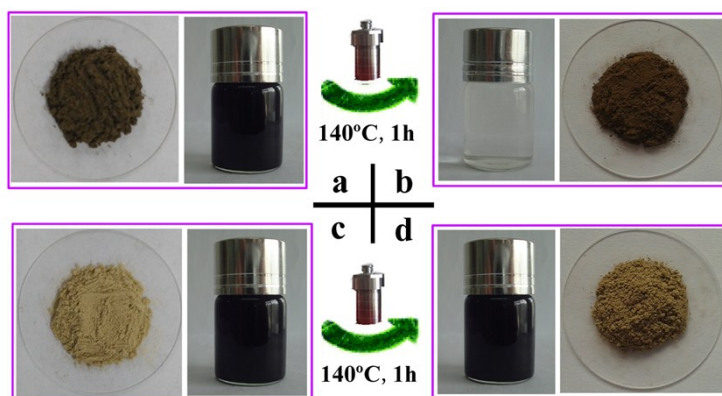

**Fig. S4.** Digital photographs of (a) SBE and reaction liquid before the hydrothermal reaction, (b) supernatant fluid and products after the hydrothermal reaction derived from SBE, (c) the bleaching earth and reaction liquid before the hydrothermal reaction, and (d) supernatant fluid and products after the hydrothermal reaction derived from the bleaching earth.

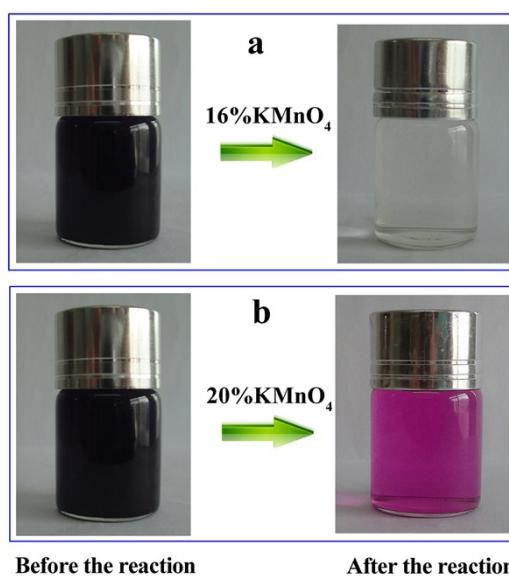

**Fig. S5.** Digital photographs of supernatant before and after hydrothermal reaction with the initial  $\text{KMnO}_4$  concentration of (a) 16% and (b) 20%.

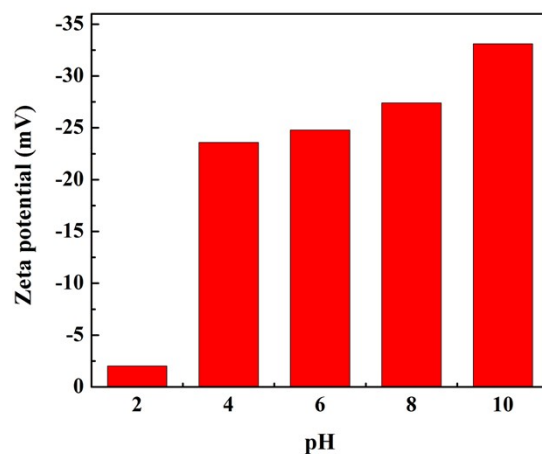

**Fig. S6.** Zeta potential of MCA<sub>7</sub> in the range of pH 2.0-10.0.

**Table S1** N<sub>2</sub> adsorption/desorption analyses of CA, MCA<sub>2</sub>, MCA<sub>4</sub>, MCA<sub>7</sub> and MCA<sub>9</sub>.

| Sample           | $S_{\text{BET}}^a$ (m <sup>2</sup> g <sup>-1</sup> ) | $S_{\text{ext}}^b$ (m <sup>2</sup> g <sup>-1</sup> ) | $V_{\text{tot}}^c$ (cm <sup>3</sup> g <sup>-1</sup> ) | $D_{\text{pore}}^d$ (nm) |
|------------------|------------------------------------------------------|------------------------------------------------------|-------------------------------------------------------|--------------------------|
| SBE              | 2.3                                                  | 3.5                                                  | 0.0027                                                | 3.85                     |
| CA               | 46.9                                                 | 53.1                                                 | 0.1991                                                | 16.95                    |
| MCA <sub>2</sub> | 66.1                                                 | 90.5                                                 | 0.2319                                                | 14.03                    |
| MCA <sub>4</sub> | 48.3                                                 | 53.9                                                 | 0.2056                                                | 17.03                    |
| MCA <sub>7</sub> | 65.9                                                 | 76.1                                                 | 0.2655                                                | 16.11                    |
| MCA <sub>9</sub> | 94.6                                                 | 104.6                                                | 0.3303                                                | 13.96                    |

<sup>a</sup> BET (Brunauer–Emmett–Teller) surface area. <sup>b</sup> External surface area, calculated using *t*-plot method. <sup>c</sup> Total pore volume, measured at P/P<sub>0</sub> = 0.974. <sup>d</sup> Average pore diameter, calculated by  $D_{\text{pore}} = 4 V/A$  according to BET.
